# Supplementary material
Source: publisher site journal article supplement (https://www.dovepress.com/article/395428)
Supplement: Supplementary file 1 [file get_supplementary_file.php]

**Supplementary table 1** Univariate and multivariate analysis on predictors for percutaneous drainage

| Variables | Antibiotics only (n=99) | Antibiotics + PD  (n=197) | *P* value |  | Multivariate analysis | | |
| --- | --- | --- | --- | --- | --- | --- | --- |
|  | OR | 95% CI | *P* value |
| Sex, male, n (%) | 40 (40.4) | 112 (56.9) | 0.008 |  | 2.009 | 1.158-3.487 | 0.013 |
| Age (years), mean ± SD | 52.9±13.6 | 55.6±12.1 | 0.075 |  |  |  |  |
| Co-morbidities, n (%) |  |  |  |  |  |  |  |
| Hypertension | 15 (15.2) | 28 (14.2) | 0.829 |  |  |  |  |
| Diabetes mellitus | 28 (28.3) | 70 (35.5) | 0.211 |  |  |  |  |
| Clinical presentation, n (%) |  |  |  |  |  |  |  |
| Fever | 90 (90.9) | 172 (87.3) | 0.360 |  |  |  |  |
| Chilly | 63 (63.6) | 120 (60.9) | 0.649 |  |  |  |  |
| Nausea/vomiting | 21 (21.2) | 32 (16.2) | 0.293 |  |  |  |  |
| Abdominal pain | 48 (48.5) | 87 (44.2) | 0.481 |  |  |  |  |
| Cough | 19 (19.2) | 27 (13.7) | 0.219 |  |  |  |  |
| Biochemical results, n (%) |  |  |  |  |  |  |  |
| WBC (*10^9/L) b | 10.8 (7.2) | 11.4 (6.4) | 0.472 |  |  |  |  |
| HB (g/L) a | 106.9±23.1 | 103.1±19.6 | 0.140 |  |  |  |  |
| ALB (g/L) a | 29.8±6.1 | 29.8±7.3 | 0.966 |  |  |  |  |
| ALT (U/L) b | 34.0 (40.8) | 39.4 (51.7) | 0.286 |  |  |  |  |
| AST (U/L) b | 35.0 (43.5) | 36.6 (35.1） | 0.671 |  |  |  |  |
| TB (umol/L) b | 16.7 (28.6） | 13.5 (15.7) | 0.017 |  | 0.992 | 0.984-1.000 | 0.045 |
| Imaging findings |  |  |  |  |  |  |  |
| Multiple lesions, n (%) | 33 (33.3) | 48 (24.4) | 0.103 |  |  |  |  |
| Size (cm) a | 5.3±3.0 | 7.9±2.8 | <0.001 |  | 1.032 | 1.021-1.042 | <0.001 |
| Hospitalization days b | 15.0 (11.7) | 16.0 (10.0) | 0.693 |  |  |  |  |

PD: percutaneous drainage, WBC: white blood cell, ALB: Albumin, TB: total bilirubin, HB: Hemoglobin, a represents mean ± SD, b represents median (IQR)
